# Supplementary material for: Influence of mesoscale eddies on the distribution of nitrous oxide in the eastern tropical South Pacific
Source: Copernicus journal article supplement (doi:10.5194/bg-13-1105-2016), 2016-02-23
Supplement: Supplementary file 1 [file bg-13-1105-2016-supplement.pdf]

Supplement of Biogeosciences, 13, 1105–1118, 2016  
<http://www.biogeosciences.net/13/1105/2016/>  
doi:10.5194/bg-13-1105-2016-supplement  
© Author(s) 2016. CC Attribution 3.0 License.

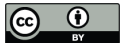

Biogeosciences  Open Access

*Supplement of*

## **Influence of mesoscale eddies on the distribution of nitrous oxide in the eastern tropical South Pacific**

**Damian L. Arévalo-Martínez et al.**

*Correspondence to:* Damian L. Arévalo-Martínez (darevalo@geomar.de)

The copyright of individual parts of the supplement might differ from the CC-BY 3.0 licence.

# 1 Supplement

2  
3

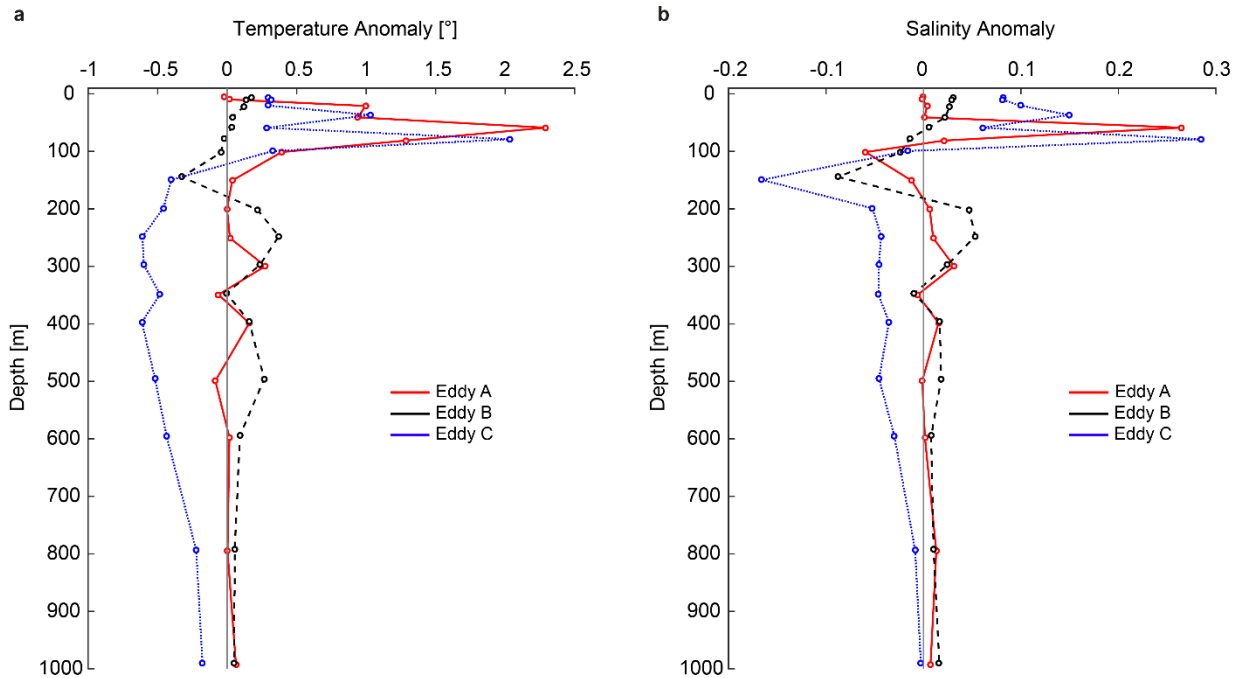

4

5 Figure S1. Temperature (a) and salinity (b) core anomalies (for definition see main text) from  
6 selected depth profiles across the mode water eddies A (red lines), B (black lines), and the  
7 cyclonic eddy C (blue lines) during the M90 cruise in November 2012. The name and location of  
8 the sampling stations used to compute the anomalies is indicated in Figs. 1 and 3 of the main  
9 text.

10  
11  
12  
13  
14  
15  
16

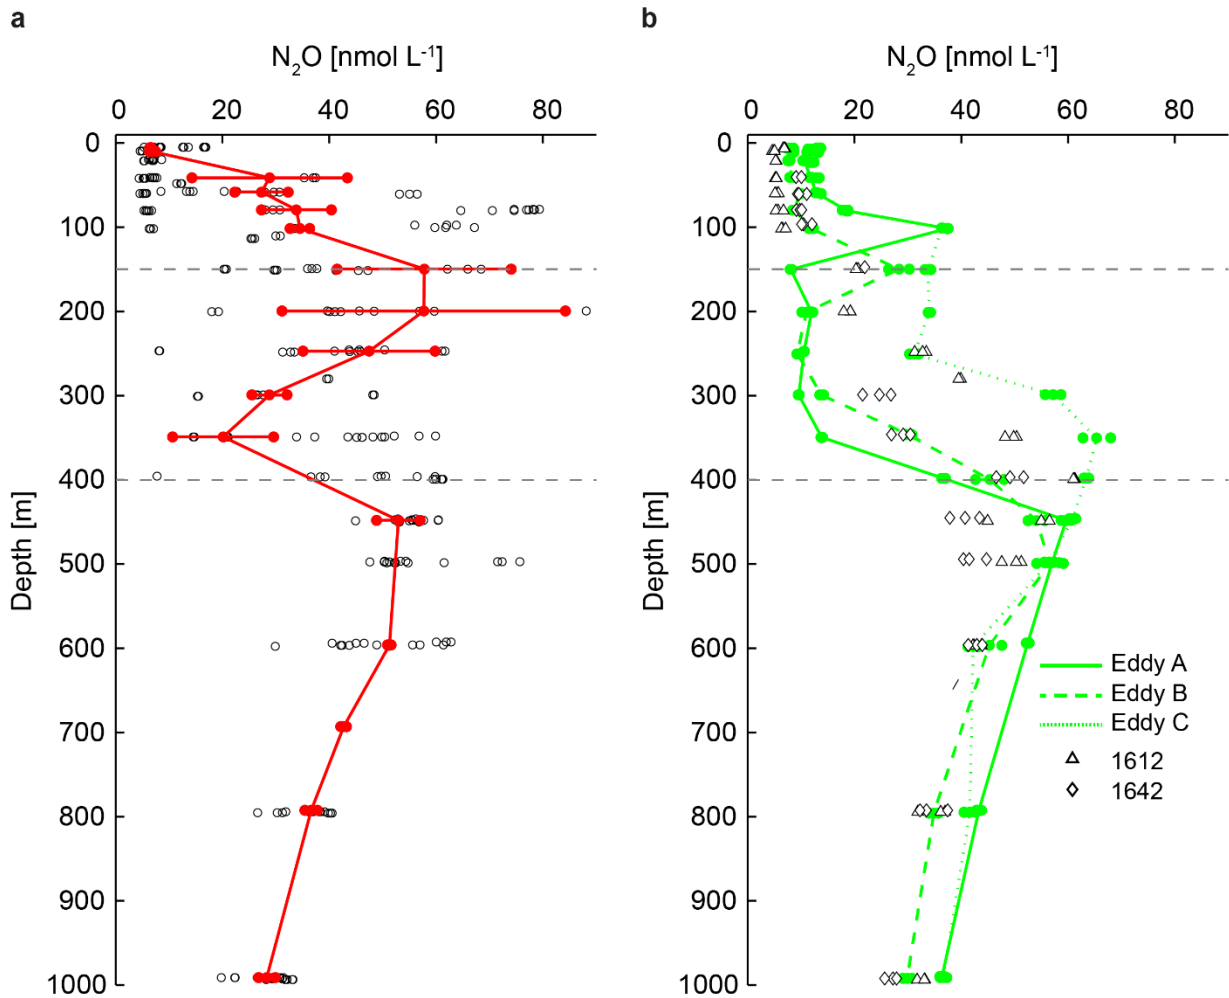

18

19 Figure S2. Comparison of  $N_2O$  distribution within the center of the eddies and background  
 20 conditions in the ETSP. In (a), the  $N_2O$  concentrations from stations along the 86°W section (6°S  
 21 – 16°S; black circles) which were used to compute a mean open ocean profile (red lines/circles)  
 22 are shown. The red horizontal lines and dots in (a) indicate the standard deviation from the mean  
 23 profile (data from Kock et al. (2016)). In (b) the  $N_2O$  concentrations of stations at the center of  
 24 eddies A, B, and C, as well as from stations 1612 ( $\Delta$ ) and 1642 ( $\diamond$ ) (cf. Fig. 1) are shown. The  
 25 grey dashed lines in (a) and (b) indicate the depth range of the OMZ core (waters with  $O_2 < 5$   
 26  $\mu\text{mol L}^{-1}$ ).

27

28

29

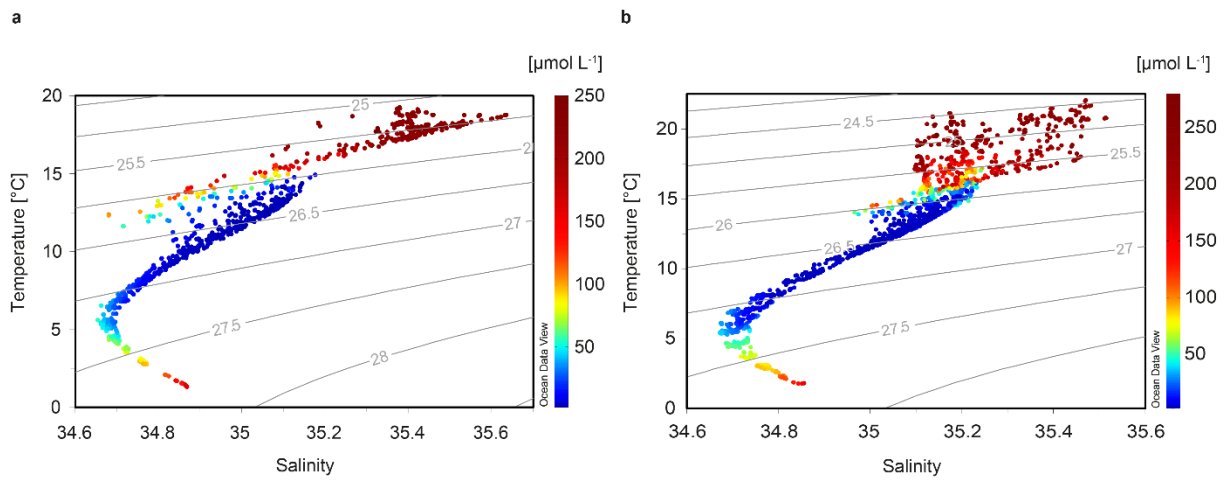

30

31 Figure S3. T-S diagrams from stations between about 15°S – 18°S and 86°W – 75°W (cf. Fig. 1)  
32 during the M90 (a) and M91 (b) cruises in December-November 2012. The color code  
33 corresponds to the measured O<sub>2</sub> concentrations.

34

35

36

37

38

39
